# Supplementary material for: Associations of Cognitive Complaints and Depressive Symptoms with Health-Related Quality of Life and Perceived Overall Health in Japanese Adult Volunteers
Source: MDPI journal article supplement (doi:10.3390/ijerph18189647), 2021-09-13
Supplement: s1 [file s1]

**Table S1. Standardized path coefficients using COBRA, PHQ-9 and EQ-5D-5L scores (N = 446).**

| <b>Direct effect to</b>               |                     |                          |
|---------------------------------------|---------------------|--------------------------|
| <b>From</b>                           | PHQ-9               | EQ-5D-5L                 |
| PHQ-9                                 |                     | −0.57 <sup>***</sup>     |
| COBRA                                 | 0.38 <sup>***</sup> | −0.02                    |
| <b>Indirect effect to (via PHQ-9)</b> |                     |                          |
| <b>From</b>                           |                     | EQ-5D-5L                 |
| COBRA                                 |                     | −0.22 <sup>***</sup>     |
| <b>Total effect to</b>                |                     |                          |
| <b>From</b>                           | PHQ-9               | EQ-5D-5L ( $R^2=0.334$ ) |
| PHQ-9                                 |                     | −0.57 <sup>***</sup>     |
| COBRA                                 | 0.38 <sup>***</sup> | −0.24 <sup>***</sup>     |

*Abbreviations:* \*  $p < 0.05$ , \*\*  $p < 0.01$ , \*\*\*  $p < 0.001$ .

**Table S2. Standardized path coefficients using COBRA, PHQ-9 and EQ-VAS scores (N = 446).**

| <b>Direct effect to</b>               |                     |                        |
|---------------------------------------|---------------------|------------------------|
| <b>From</b>                           | PHQ-9               | EQ-VAS                 |
| PHQ-9                                 |                     | −0.45 <sup>***</sup>   |
| COBRA                                 | 0.38 <sup>***</sup> | −0.02                  |
| <b>Indirect effect to (via PHQ-9)</b> |                     |                        |
| <b>From</b>                           |                     | EQ-VAS                 |
| COBRA                                 |                     | −0.17 <sup>***</sup>   |
| <b>Total effect to</b>                |                     |                        |
| <b>From</b>                           | PHQ-9               | EQ-VAS ( $R^2=0.210$ ) |
| PHQ-9                                 |                     | −0.45 <sup>***</sup>   |
| COBRA                                 | 0.38 <sup>***</sup> | −0.19 <sup>***</sup>   |

*Abbreviations:* \*  $p < 0.05$ , \*\*  $p < 0.01$ , \*\*\*  $p < 0.001$ .

**Table S3. Standardized path coefficients using COBRA, PHQ-9 and EQ-5D-5L scores (N = 59).**

| <b>Direct effect to</b>               |                    |                          |
|---------------------------------------|--------------------|--------------------------|
| <b>From</b>                           | PHQ-9              | EQ-5D-5L                 |
| PHQ-9                                 |                    | −0.56 <sup>***</sup>     |
| COBRA                                 | 0.39 <sup>**</sup> | −0.22 <sup>*</sup>       |
| <b>Indirect effect to (via PHQ-9)</b> |                    |                          |
| <b>From</b>                           |                    | EQ-5D-5L                 |
| COBRA                                 |                    | −0.22 <sup>**</sup>      |
| <b>Total effect to</b>                |                    |                          |
| <b>From</b>                           | PHQ-9              | EQ-5D-5L ( $R^2=0.454$ ) |
| PHQ-9                                 |                    | −0.56 <sup>***</sup>     |
| COBRA                                 | 0.39 <sup>**</sup> | −0.44 <sup>***</sup>     |

*Abbreviations:* <sup>\*</sup>  $p < 0.05$ , <sup>\*\*</sup>  $p < 0.01$ , <sup>\*\*\*</sup>  $p < 0.001$ .

**Table S4. Standardized path coefficients using COBRA, PHQ-9 and EQ-VAS scores (N = 59).**

| <b>Direct effect to</b>               |                    |                        |
|---------------------------------------|--------------------|------------------------|
| <b>From</b>                           | PHQ-9              | EQ-VAS                 |
| PHQ-9                                 |                    | −0.59 <sup>***</sup>   |
| COBRA                                 | 0.39 <sup>**</sup> | −0.24 <sup>*</sup>     |
| <b>Indirect effect to (via PHQ-9)</b> |                    |                        |
| <b>From</b>                           |                    | EQ-VAS                 |
| COBRA                                 |                    | −0.23 <sup>**</sup>    |
| <b>Total effect to</b>                |                    |                        |
| <b>From</b>                           | PHQ-9              | EQ-VAS ( $R^2=0.524$ ) |
| PHQ-9                                 |                    | −0.59 <sup>***</sup>   |
| COBRA                                 | 0.39 <sup>**</sup> | −0.48 <sup>***</sup>   |

*Abbreviations:* <sup>\*</sup>  $p < 0.05$ , <sup>\*\*</sup>  $p < 0.01$ , <sup>\*\*\*</sup>  $p < 0.001$ .

**Table S5. Standardized path coefficients using PHQ-9, COBRA and EQ-5D-5L scores (N = 525).**

| <b>Direct effect to</b>               |              |                                          |
|---------------------------------------|--------------|------------------------------------------|
| <b>From</b>                           | <b>COBRA</b> | <b>EQ-5D-5L</b>                          |
| COBRA                                 |              | −0.05                                    |
| PHQ-9                                 | 0.40***      | −0.58***                                 |
| <b>Indirect effect to (via COBRA)</b> |              |                                          |
| <b>From</b>                           |              | <b>EQ-5D-5L</b>                          |
| PHQ-9                                 |              | −0.02                                    |
| <b>Total effect to</b>                |              |                                          |
| <b>From</b>                           | <b>COBRA</b> | <b>EQ-5D-5L (<math>R^2=0.366</math>)</b> |
| COBRA                                 |              | −0.05                                    |
| PHQ-9                                 | 0.40***      | −0.60***                                 |

*Abbreviations:* \*  $p < 0.05$ , \*\*  $p < 0.01$ , \*\*\*  $p < 0.001$ .

**Table S6. Standardized path coefficients using PHQ-9, COBRA and EQ-VAS scores (N = 525).**

| <b>Direct effect to</b>               |              |                                        |
|---------------------------------------|--------------|----------------------------------------|
| <b>From</b>                           | <b>COBRA</b> | <b>EQ-VAS</b>                          |
| COBRA                                 |              | −0.05                                  |
| PHQ-9                                 | 0.40***      | −0.49***                               |
| <b>Indirect effect to (via COBRA)</b> |              |                                        |
| <b>From</b>                           |              | <b>EQ-VAS</b>                          |
| PHQ-9                                 |              | −0.02                                  |
| <b>Total effect to</b>                |              |                                        |
| <b>From</b>                           | <b>COBRA</b> | <b>EQ-VAS (<math>R^2=0.261</math>)</b> |
| COBRA                                 |              | −0.05                                  |
| PHQ-9                                 | 0.40***      | −0.51***                               |

*Abbreviations:* \*  $p < 0.05$ , \*\*  $p < 0.01$ , \*\*\*  $p < 0.001$ .
